# Supplementary material for: Insulin Growth Factor-2 Binding Protein 3 (IGF2BP3) Is a Glioblastoma-specific Marker That Activates Phosphatidylinositol 3-Kinase/Mitogen-activated Protein Kinase (PI3K/MAPK) Pathways by Modulating IGF-2
Source: PubMed Central journal article supplement — J Biol Chem. 2011 May 25;286(29):25882–90. doi: 10.1074/jbc.M110.178012 (PMC3138258; doi:10.1074/jbc.m110.178012), 2011-05-25
Supplement: supp_M110.178012_jbc.M110.178012-2.pdf [file supp_M110.178012_jbc.M110.178012-2.pdf]

**Supplementary Table  
and Figures (SF1-SF9)**

## Significance analysis of differential regulation of IGF family members during glioma development\*

| S. No | Gene ID | ANOVA p value followed by Dunnet's Post hoc test | Normals vs DAI/AAIII | Normals vs GBMs | DAII/AAIII vs GBMs |
|-------|---------|--------------------------------------------------|----------------------|-----------------|--------------------|
| 1     | IGF1    | p=0.0033                                         | NS                   | NS              | **                 |
| 2     | IGF2    | p=0.6460                                         | NS                   | NS              | NS                 |
| 3     | IGF1R   | p=0.0009                                         | NS                   | NS              | ***                |
| 4     | IGF2R   | p=0.1400                                         | NS                   | NS              | NS                 |
| 5     | IGF2BP1 | p=0.6022                                         | NS                   | NS              | NS                 |
| 6     | IGF2BP2 | p=0.0446                                         | NS                   | NS              | NS                 |
| 7     | IGF2BP3 | p≤0.0001                                         | NS                   | ***             | ***                |
| 8     | IGFL1   | p=0.4773                                         | NS                   | NS              | NS                 |
| 9     | IGFL2   | p=0.0161                                         | NS                   | NS              | *                  |
| 10    | IGFL3   | p=0.2385                                         | NS                   | NS              | NS                 |
| 11    | IGFL4   | p=0.0590                                         | NS                   | NS              | *                  |
| 12    | IGF2AS  | p=0.2314                                         | NS                   | NS              | NS                 |

Log 2-transformed gene expression ratios obtained from RT-qPCR analysis of indicated samples were calculated for the transcript levels of the following genes - IGF-1, IGF-2, IGF-1R, IGF-2R, IGF2BP1, IGF2BP2, IGF2BP3/IMP3, IGF2AS, IGFL1, IGFL2, IGFL3, IGFL4. For each sample, fold change in gene expression is calculated over its mean expression in normal brain samples after normalization with six different internal reference genes - AGPAT, GARS, ATP5G1, GAPDH, ACTB and RPL35A. These log 2-transformed gene expression values were then subjected to one way analysis of variance (ANOVA) and a dunnet's post hoc test was carried out to test for significance. After analysis, no significant change in the transcript levels of the various IGF family members was found except for IGF2BP3/IMP3 which was significantly up regulated in the grade IV astrocytomas or glioblastomas compared to the normal brain samples and the grade II/grade III astrocytomas.

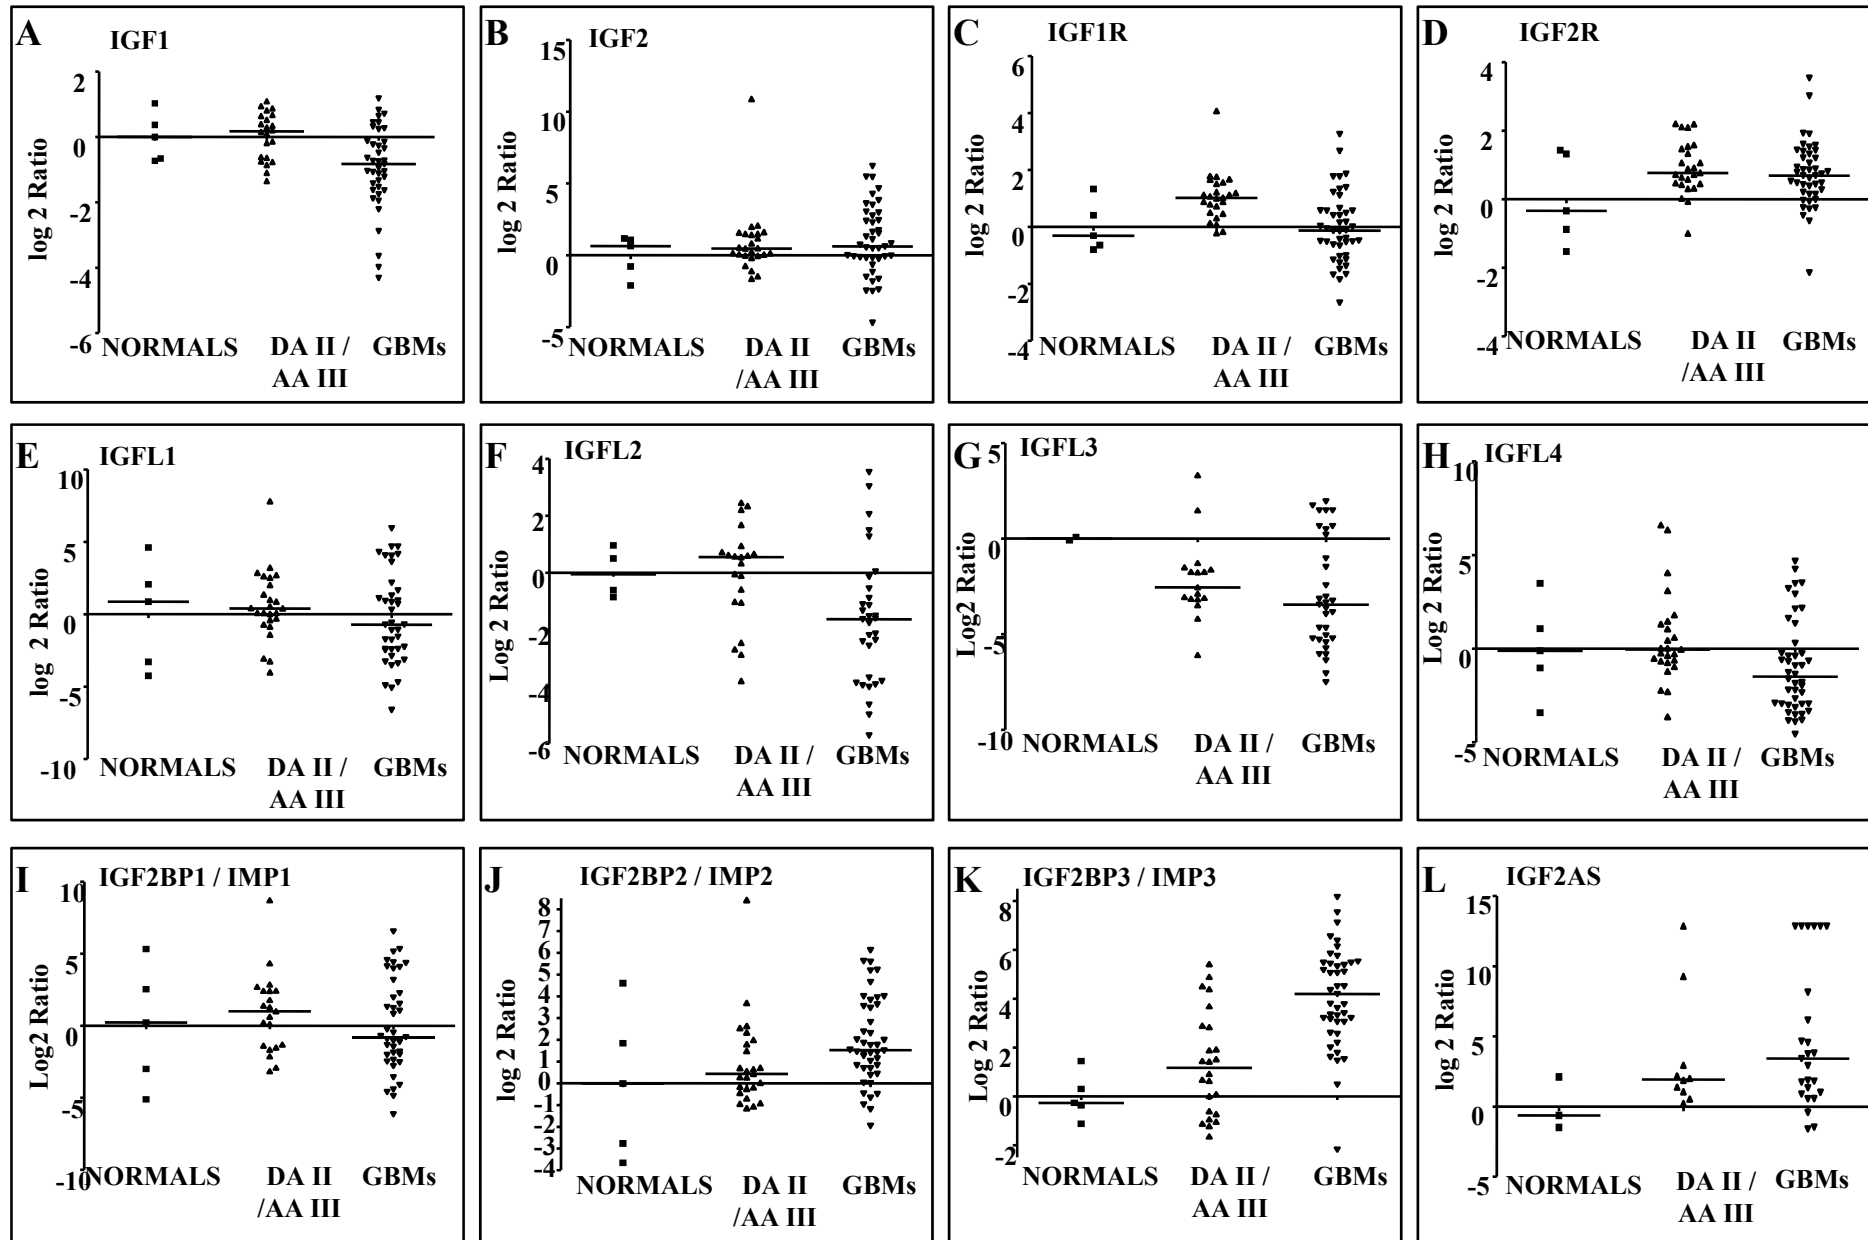

**A**

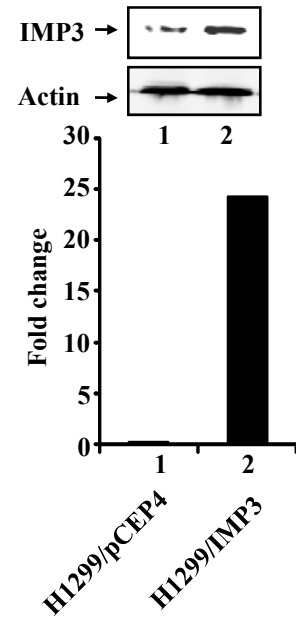

**C**

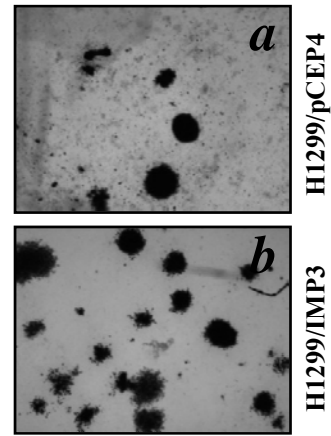

**E**

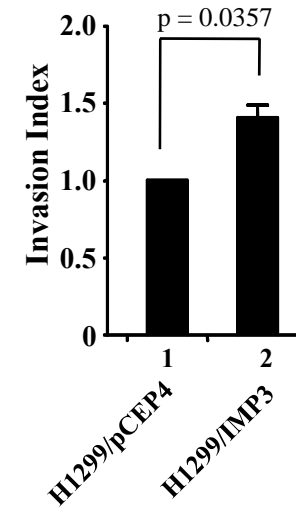

**B**

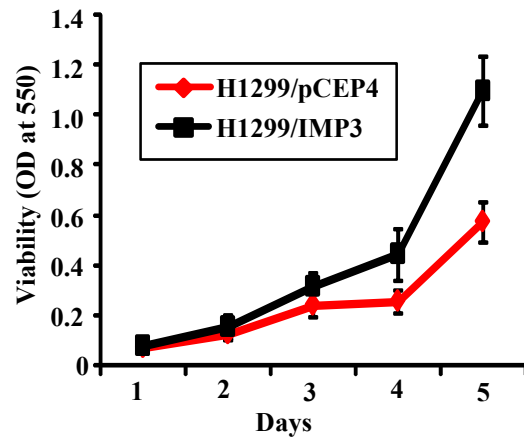

**D**

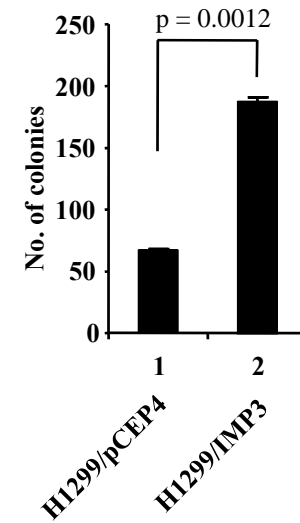

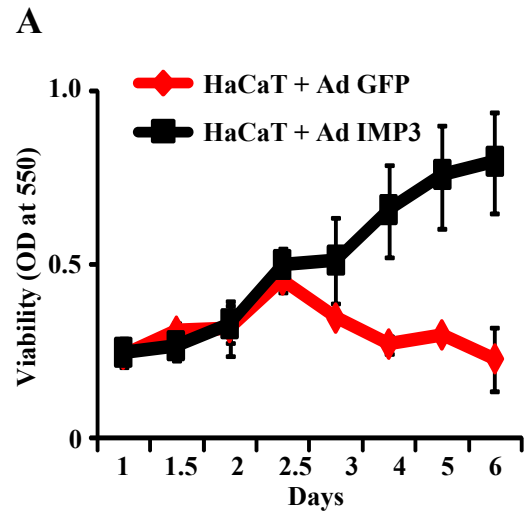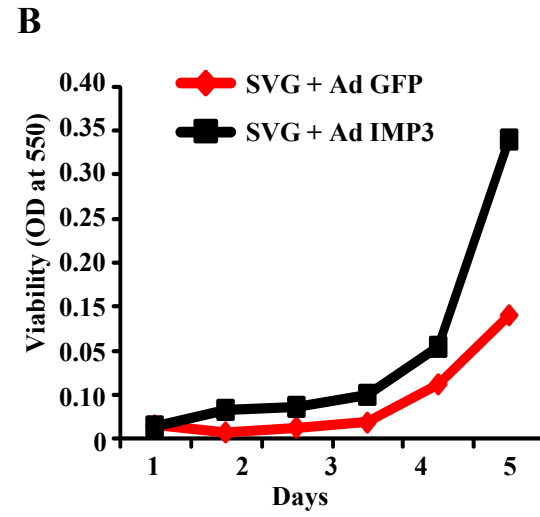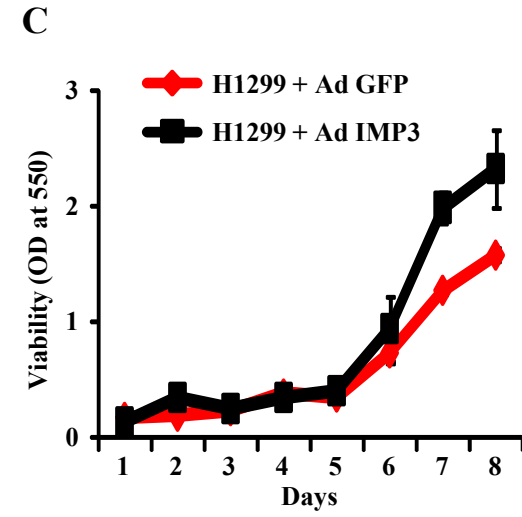

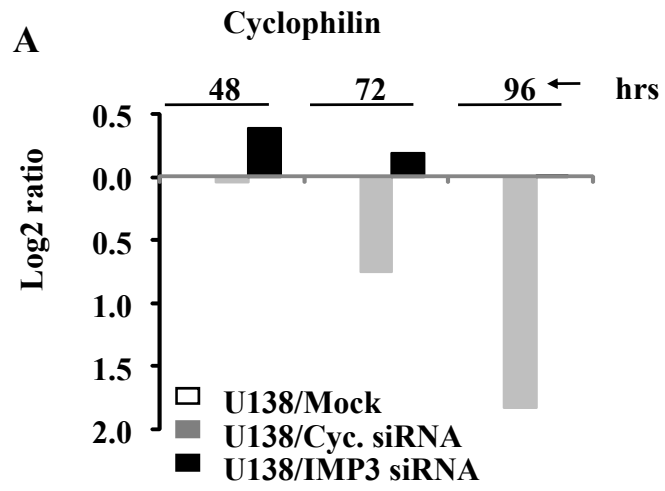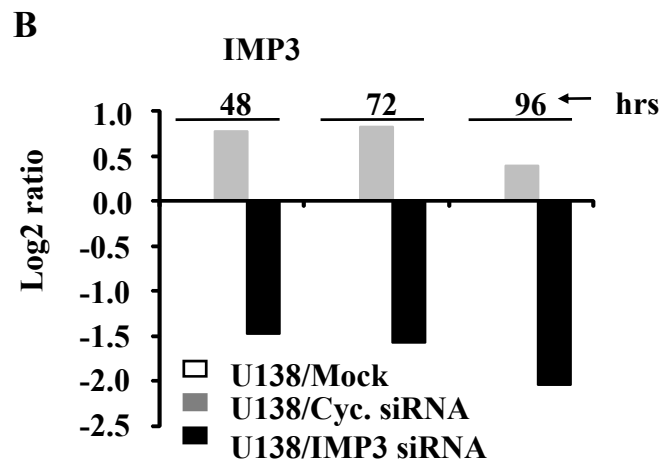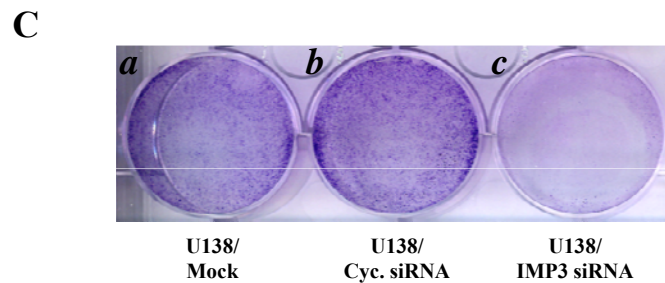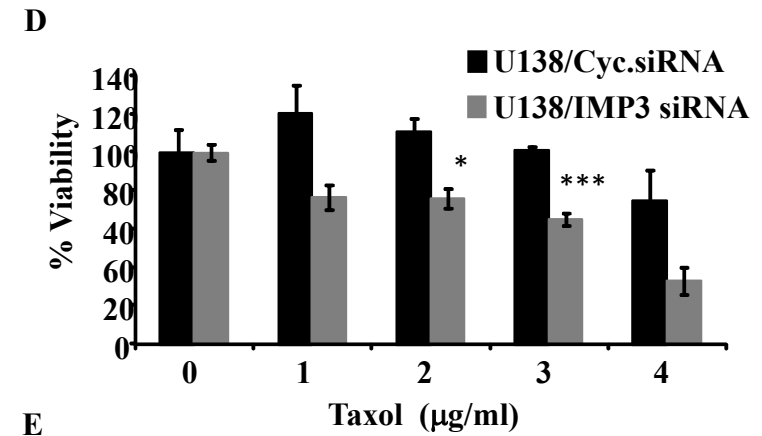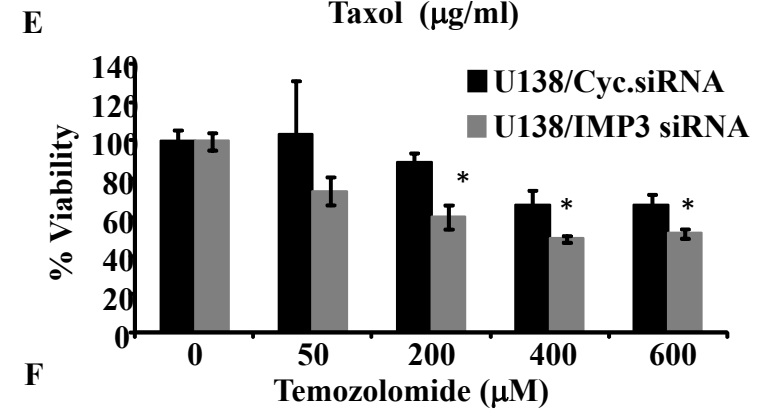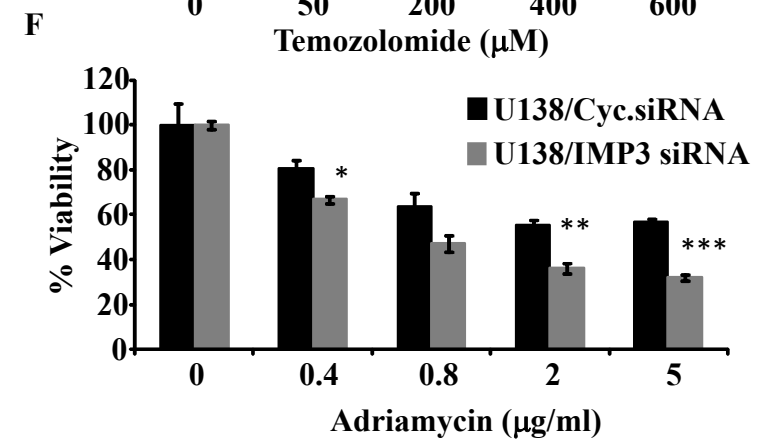

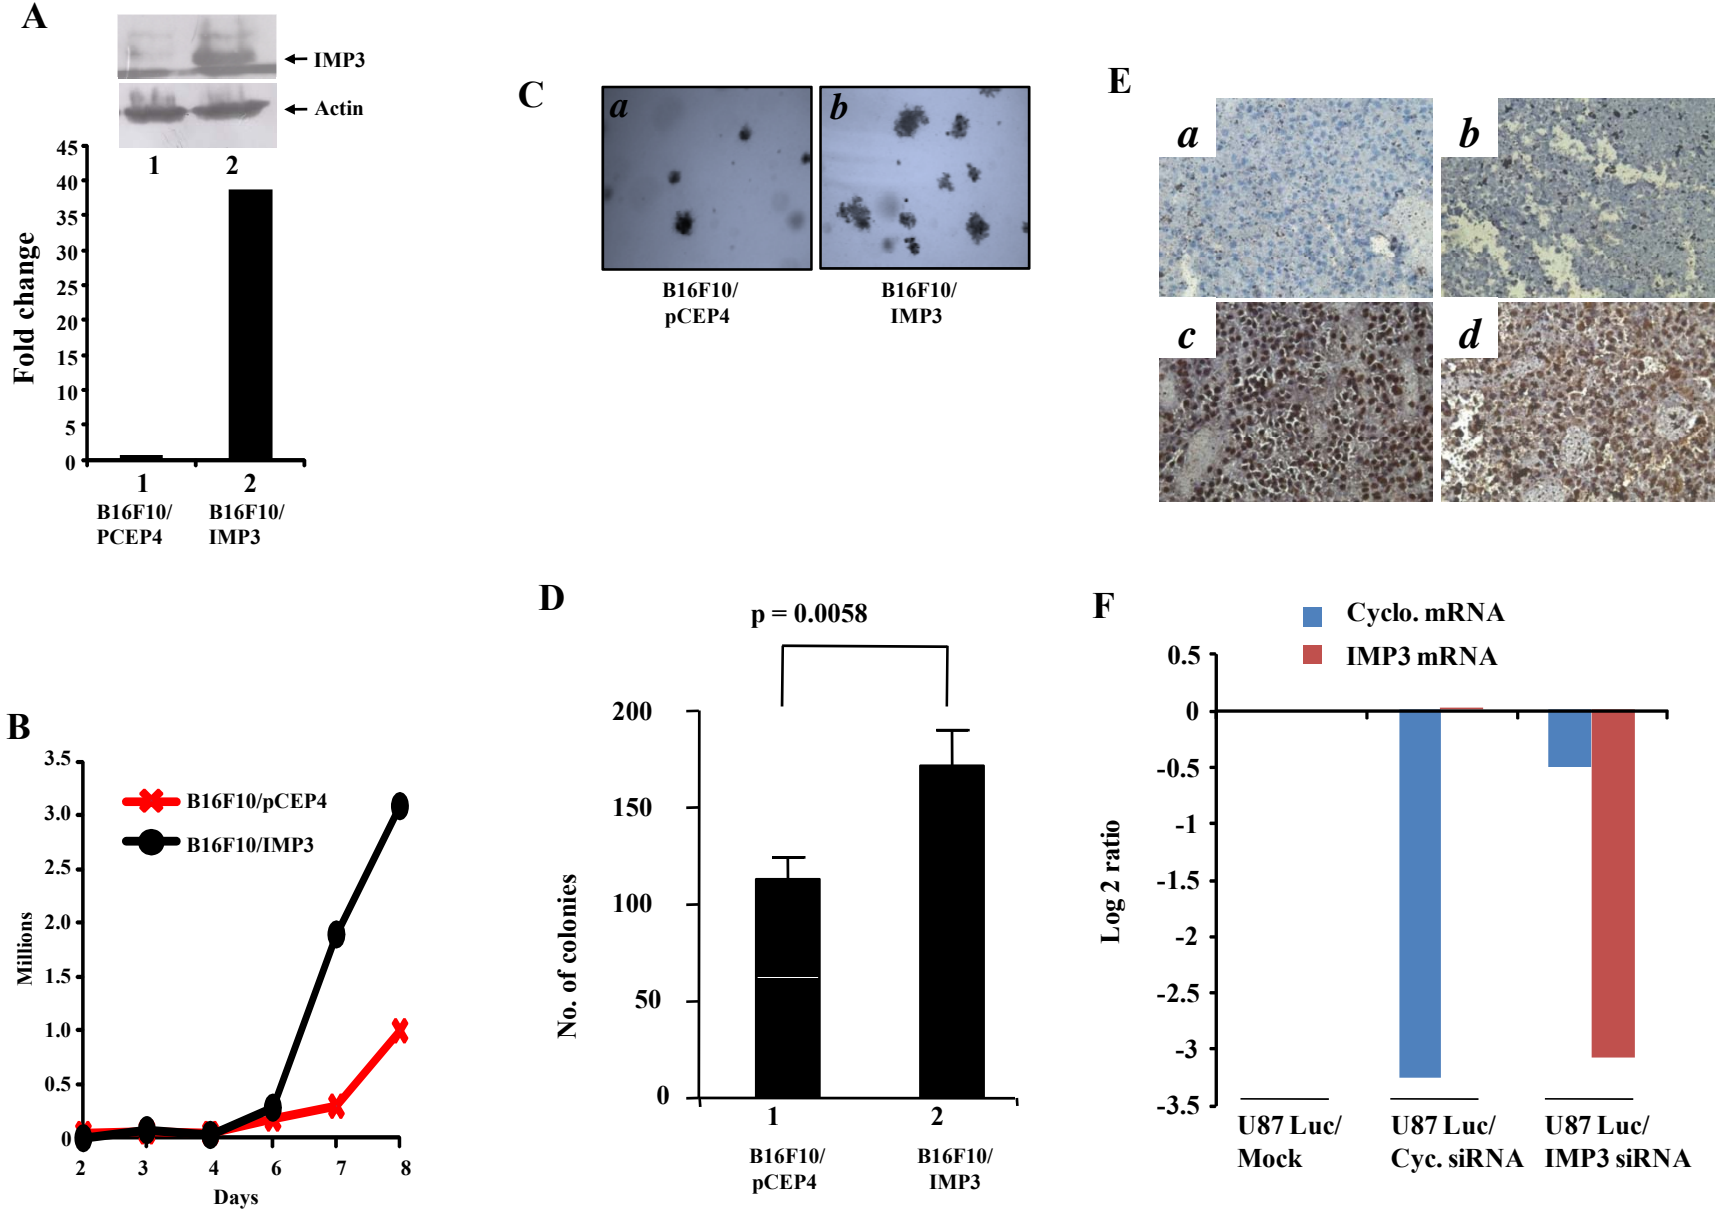

A

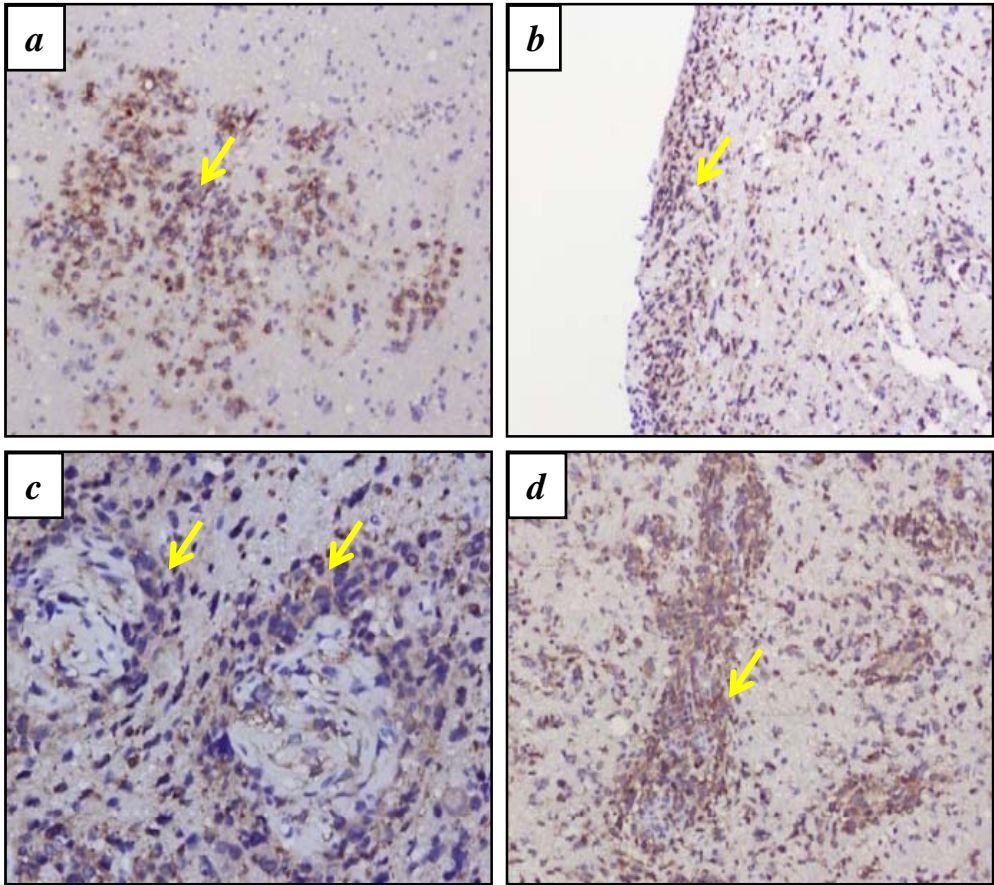

B

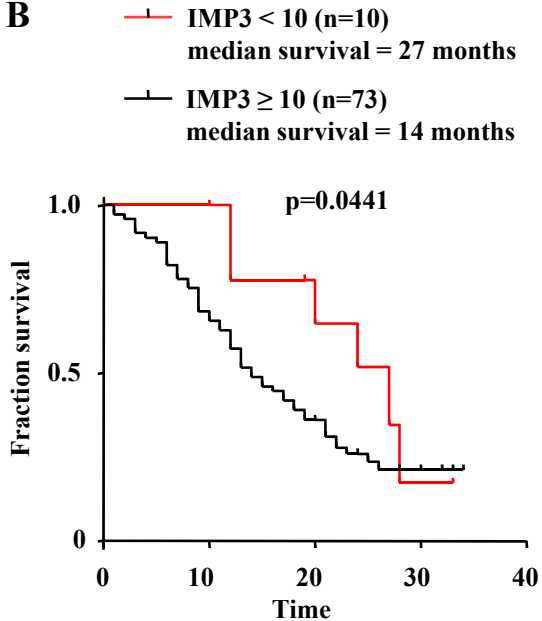



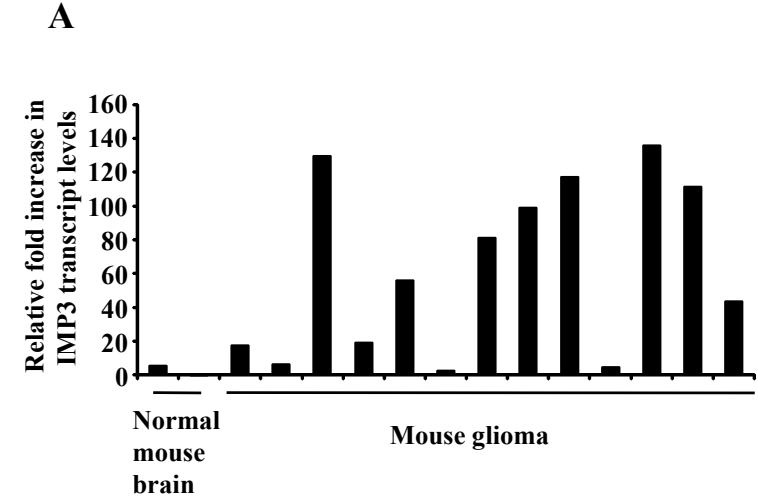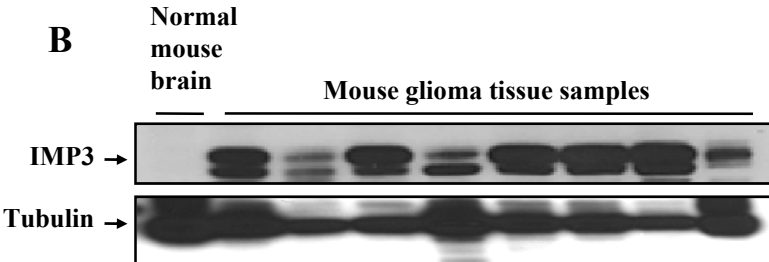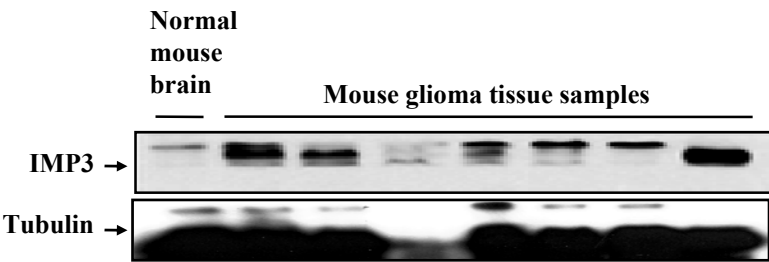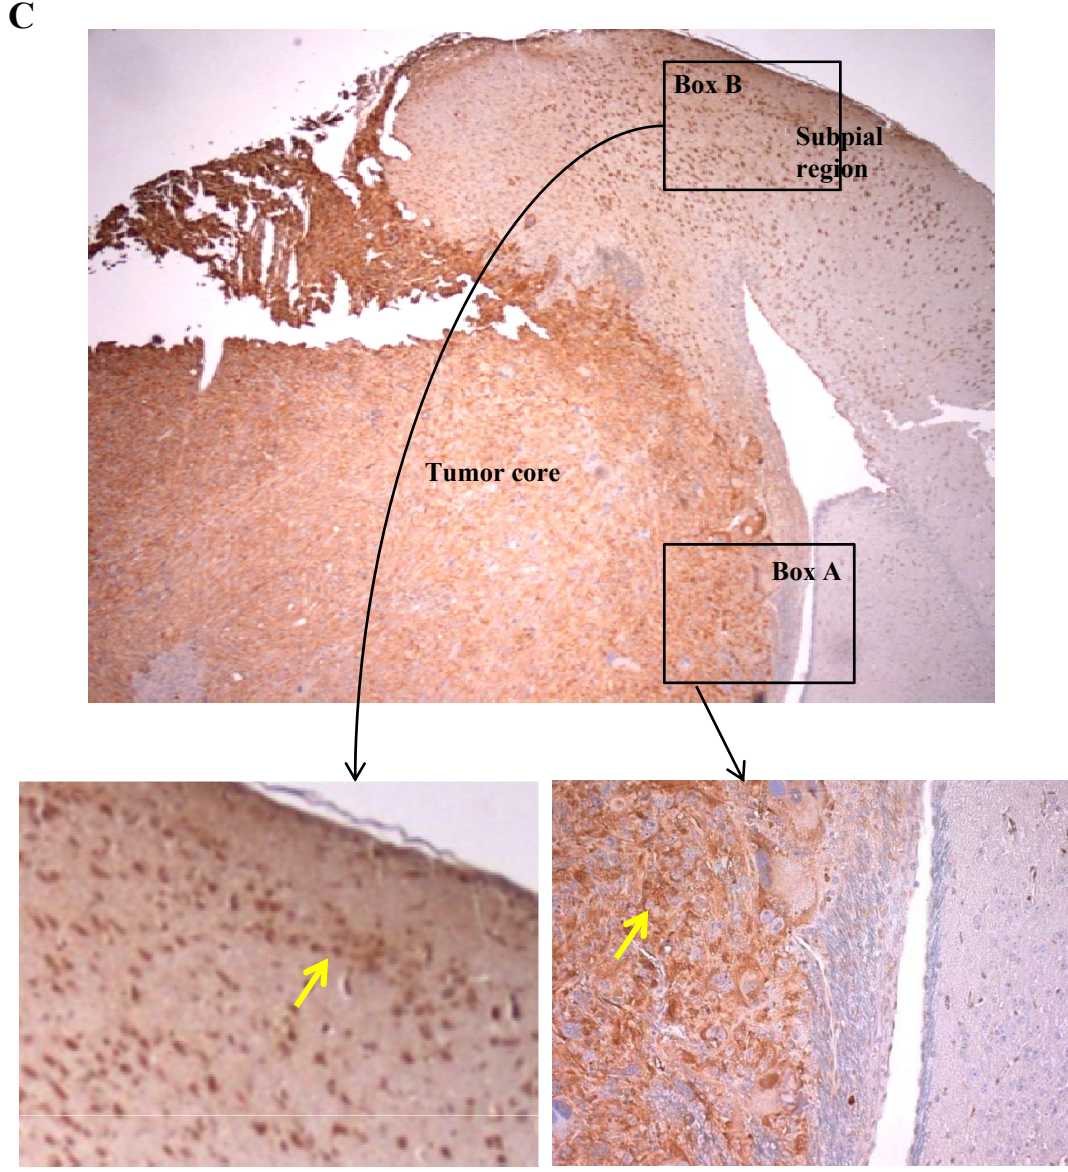

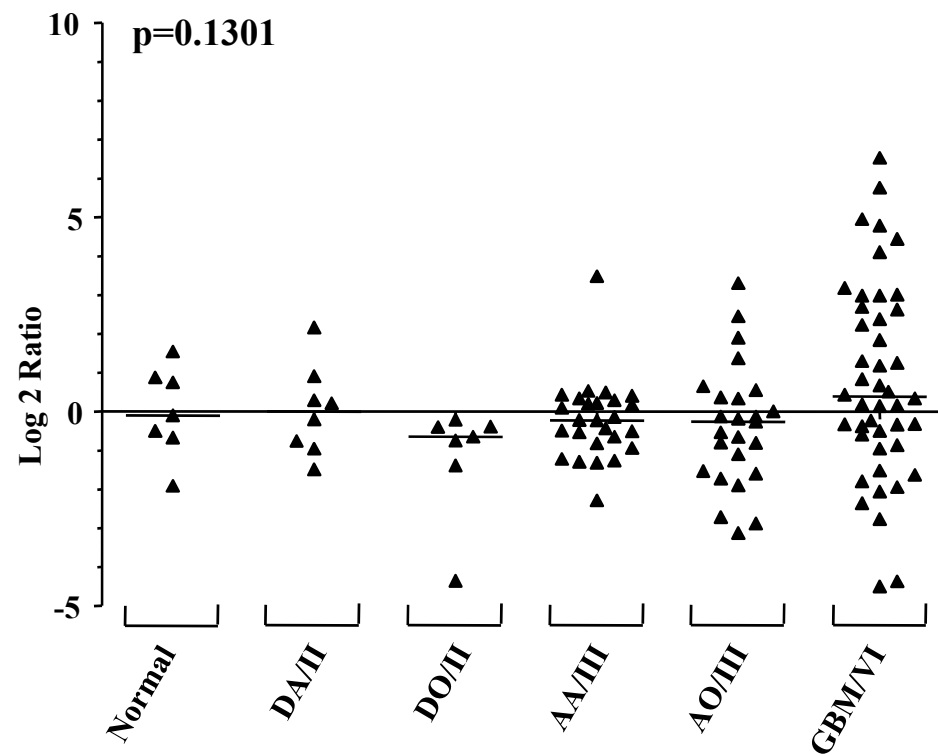

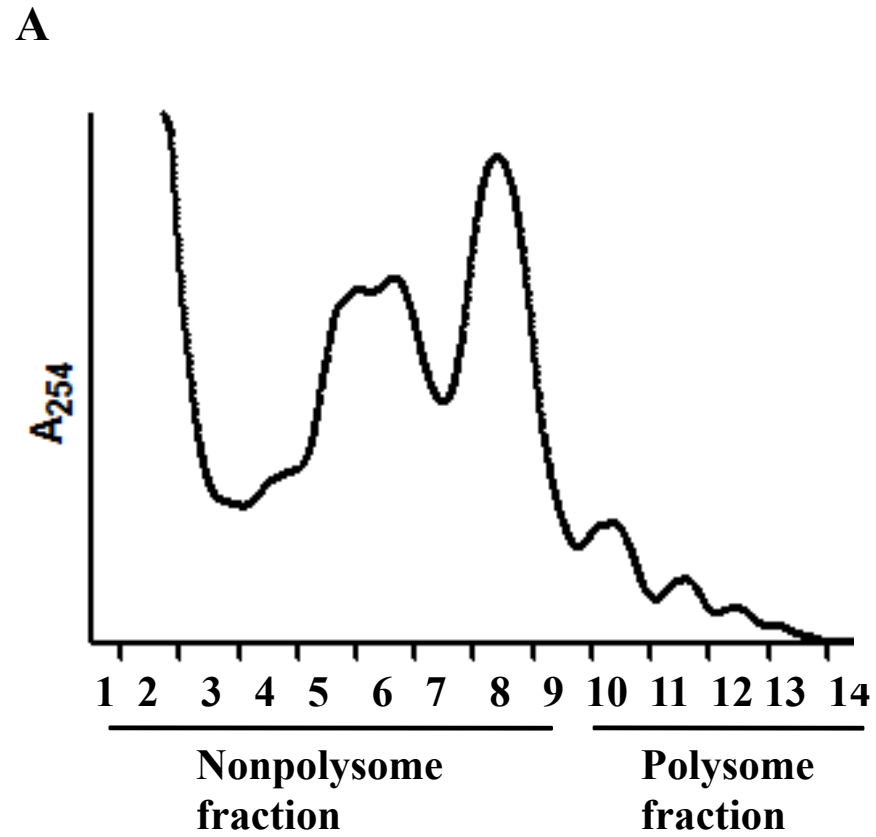

**Cyclophilin siRNA**

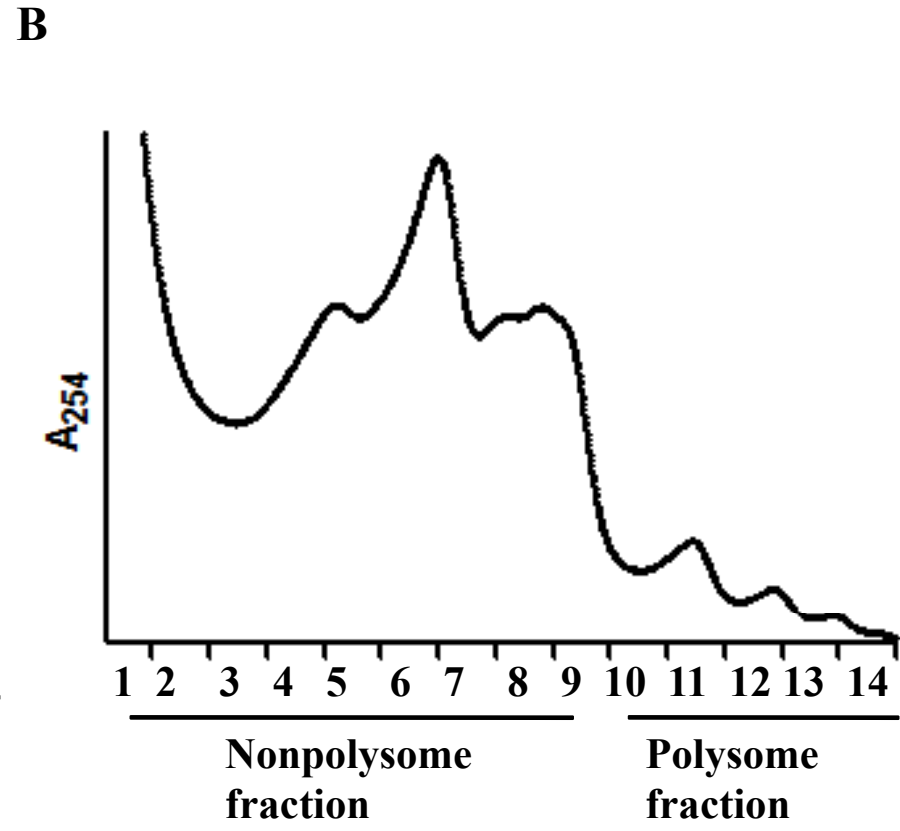

**IMP3 siRNA**
